# Supplementary material
Source: Springer Nature journal article supplement (https://www.springermedizin.de/resource/supplementary/13054_2010_8683_MOESM10_ESM.pdf/9732778)

# NT-proBNP levels at 24 hours

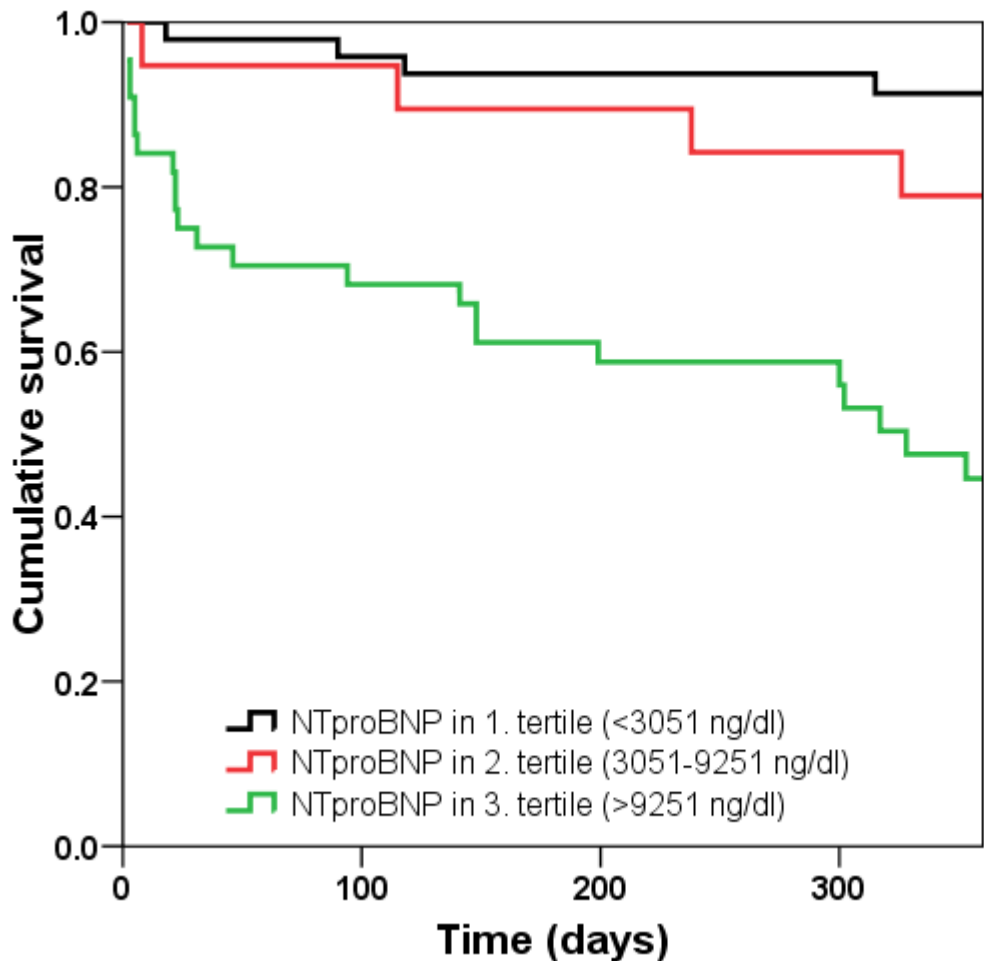

Supplement: MOESM10 [file 9732778]
